# Supplementary material for: Contamination level of four priority phthalates in North Indian wastewater treatment plants and their fate in sequencing batch reactor systems
Source: Royal Society of Chemistry journal article supplement (doi:10.1039/c5em00583c), 2016-01-01
Supplement: c5em00583c1.pdf [file c5em00583c1.pdf]

## Contamination level of four priority phthalates in north Indian wastewater treatment plants and their fate in sequencing batch reactor system

Khalid Muzamil Gani, Ankur Rajpal, Absar Ahmad Kazmi

### Supplementary Data

Table S1 Chemical and physical properties of phthalates analyzed in the study.

| Name of Phthalate      | Chemical formula*                              | Molecular weight (g/mol)* | CAS number* | Log K <sub>OW</sub> * | Henry's constant k <sub>H</sub> (atm m <sup>3</sup> /mol) | Chemical structure*                                                                   |
|------------------------|------------------------------------------------|---------------------------|-------------|-----------------------|-----------------------------------------------------------|---------------------------------------------------------------------------------------|
| Diethyl Phthalate      | C <sub>12</sub> H <sub>14</sub> O <sub>4</sub> | 222.2                     | 84-66-2     | 2.70                  | 2.66 x 10 <sup>-7</sup>                                   | 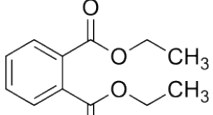   |
| Dibutyl Phthalate      | C <sub>16</sub> H <sub>22</sub> O <sub>4</sub> | 278.4                     | 84-74-2     | 4.83                  | 8.83 x 10 <sup>-7</sup>                                   |    |
| Benzylbutyl Phthalate  | C <sub>19</sub> H <sub>20</sub> O <sub>4</sub> | 312.4                     | 85-68-7     | 5.00                  | 7.61 x 10 <sup>-7</sup>                                   |   |
| Diethylhexyl Phthalate | C <sub>24</sub> H <sub>38</sub> O <sub>4</sub> | 390.57                    | 117-81-7    | 8.71                  | 1.7 x 10 <sup>-7</sup>                                    |  |

\*National Center for Biotechnology Information. PubChem Compound Database; <https://pubchem.ncbi.nlm.nih.gov/>

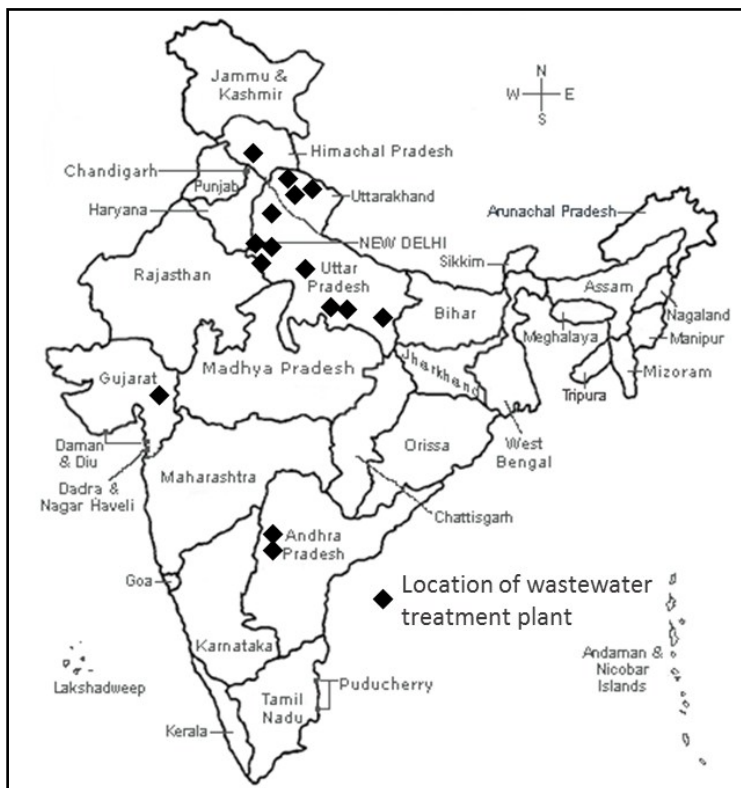

Figure S1 Map showing location of sampled fifteen wastewater treatment plants (WWTPs).

Table S2 Indexing and operational conditions of the fifteen WWTPs from where phthalate contamination in untreated and treated wastewater was evaluated

| WWTP index | City       | WWTP configuration                             | Flow rate (m <sup>3</sup> /d) | MLSS <sup>a</sup> (mg/L) | COD (mg/L) | BOD (mg/L) | TSS (mg/L) | TKN (mgN/L) | PO <sub>4</sub> -P (mg P/L) |
|------------|------------|------------------------------------------------|-------------------------------|--------------------------|------------|------------|------------|-------------|-----------------------------|
| H          | Shimla     | ASP <sup>1</sup> + Coagulation                 | 4440                          | 3200±354                 | 659±149    | 335±129    | 373±83     | 69.0±16.5   | 4.8±1.5                     |
| UP4        | Kanpur     | Conventional ASP <sup>2</sup>                  | 130000                        | 3696±340                 | 754±281    | 268±24     | 655±166    | 42.3±18.2   | 3.3±1.2                     |
| U2         | Haridwar   | Conventional ASP                               | 17000                         | 3228±276                 | 287±70     | 164±30     | 208±42     | 34.5±3.4    | 3.1±0.4                     |
| D4         | Delhi      | ASP + Biofor                                   | 181600                        | 1495±221                 | 612±92     | 241±38     | 222±40     | 61.0±7.1    | 11.3±1.3                    |
| U3         | Haridwar   | PST <sup>3</sup> +SBR <sup>4</sup>             | 27000                         | 7156±546                 | 368±39     | 180±9      | 222±27     | 27.7±1.5    | 2.5±0.6                     |
| D1         | Delhi      | A-O <sup>5</sup> + Membrane Bio Reactor        | 4540                          | 14050±342                | 947±144    | 356±110    | 242±23     | 48.9±25.6   | 13.6±4.9                    |
| D3         | Delhi      | PST + A-O + Cl <sup>6</sup>                    | 136400                        | 3198±320                 | 429±98     | 242±51     | 210±18     | 52.7±11.5   | 4.6±0.6                     |
| AP1        | Hyderabad  | A2O <sup>10</sup> + coagulation + UF + Cl      | 20000                         | N.A.                     | 628±201    | 242±88     | 407±102    | 39.0±5.7    | 2.6±0.4                     |
| AP2        | Hyderabad  | A2O + coagulation+ SF <sup>11</sup> + Cl       | 30000                         | N.A.                     | 598±167    | 237±57     | 372±134    | 48.0±9.4    | 3.4±1.2                     |
| UP1        | Allahabad  | MBBR <sup>7</sup> + Cl                         | 29000                         | -                        | 432±13     | 229±26     | 246±9      | 31.5±0.7    | 4.4±0.2                     |
| UP3        | Allahabad  | Bio tower + ASP + Cl                           | 50000                         | 1997±119                 | 630±162    | 325±171    | 469±174    | 42.0±2.6    | 2.6±0.5                     |
| UP2        | Saharanpur | UASB <sup>8</sup> + Oxidation Pond             | 38000                         | 108000±5321              | 389±69     | 197±22     | 264±89     | 44.5±0.7    | 7.0±2.5                     |
| S          | Surat      | UASB + EA + UF <sup>9</sup> + RO <sup>12</sup> | 100000                        | N.A.                     | 438±116    | 232±63     | 229±53     | 37.0±11.4   | 6.4±0.7                     |
| U1         | Rishikesh  | Oxidation pond                                 | 6000                          | -                        | 434±53     | 210±3      | 288±35     | 21.1±5.6    | 3.4±0.4                     |
| D2         | Delhi      | Densadeg + Biofor                              | 10000                         | -                        | 405±34     | 170±16     | 236±11     | 33.5±0.7    | 3.3±0.1                     |

1= Activated sludge process (extended aeration); 2= Activated sludge process; 3= Primary Settling tank; 4= Sequential Batch reactor; 5= Anoxic - Oxic; 6= Chlorination; 7= Moving bed biofilm reactor; 8= Up flow anaerobic sludge blanket; 9= Ultrafiltration; 10= Anaerobic-anoxic-oxic; 11= Sand Filters; 12= Reverse osmosis

a= MLSS of the aeration tank.

N.A. = Not Available (Data not provided).

Table S3 GC MS retention times, quantifying ions and quality assurance of analysis method.

| Phthalate ester | Retention time (min) | Quantifying ions | r <sup>2</sup> | LOD (µg/L) | LOQ (µg/L) | % Recovery* (n=6) |
|-----------------|----------------------|------------------|----------------|------------|------------|-------------------|
| DEP             | 24.45                | 149, 177, 150    | 0.97           | 0.071      | 0.210      | 84                |
| DBP             | 30.00                | 149, 150, 104    | 0.99           | 0.130      | 0.182      | 95                |
| BBP             | 35.75                | 149, 206, 123    | 0.93           | 0.216      | 0.342      | 83                |
| DEHP            | 40.10                | 149, 167, 150    | 0.96           | 0.084      | 0.241      | 80                |

\*Spiked concentration in wastewater sample = 25 µg/L

Table S4 Quality control (QC) check of the analysis method in blanks according to method 606, USEPA

| Parameter | Test Conc. (µg/L) | Average recovery (X) | Std. Dev. (S) | USEPA QC acceptance criteria |            | Recovery* (%) | Blank conc. (n=3) |
|-----------|-------------------|----------------------|---------------|------------------------------|------------|---------------|-------------------|
|           |                   |                      |               | S limit                      | Range of X |               |                   |
| DEP       | 25                | 22.73                | 3.77          | 9                            | 1.9-33.4   | 91            | nd                |
| DBP       | 25                | 25.42                | 3.07          | 8.9                          | 10.3-29.5  | 102           | nd - 0.312        |
| BBP       | 10                | 8.995                | 3.75          | 4.2                          | 5.7-11     | 90            | nd                |
| DEHP      | 50                | 42                   | 3.7           | 38.4                         | 1.2-55.9   | 84            | nd                |

\*Recovery calculated by spiking blank samples

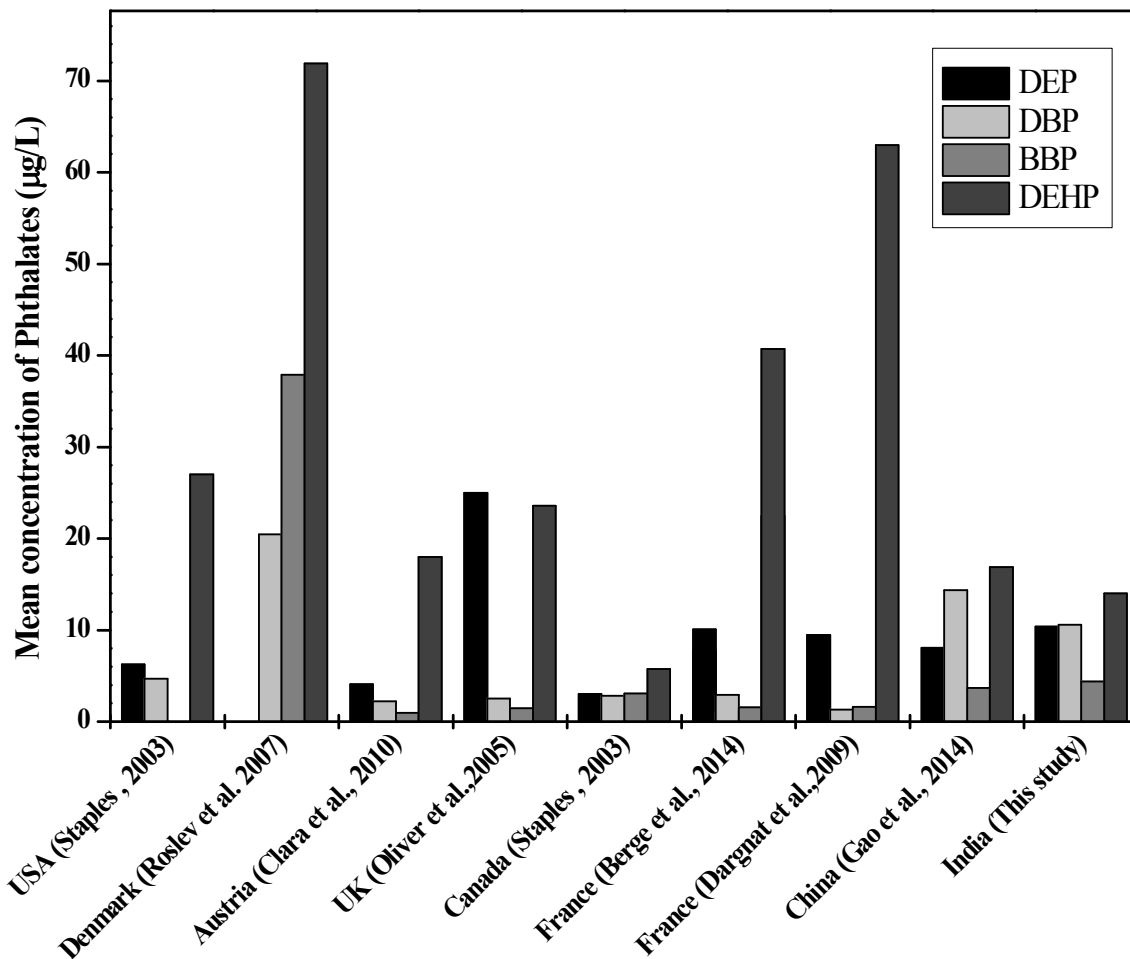

Figure S2 Mean concentration of phthalates reported in domestic wastewater in different countries.
